# Supplementary material
Source: PubMed Central journal article supplement (PMC7602883)
Supplement: NIHMS1630333-supplement-1.pdf [file NIHMS1630333-supplement-1.pdf]

**Supplementary Table 2. All canonical pathways associated with neurocognitive dysfunction in 10 Gy-treated mice.** Overlapping proteins that met statistical significance for differential expression in 10 Gy-treated animals (10 Gy vs. Control) comparisons were uploaded into Ingenuity Pathway Analysis (IPA) to identify enriched pathways.

| <b>Top Canonical Pathways</b>                                             | <b>P-value</b> |
|---------------------------------------------------------------------------|----------------|
| Synaptogenesis Signaling Pathway                                          | 1.49E+01       |
| Sirtuin Signaling Pathway                                                 | 1.40E+01       |
| EIF2 Signaling                                                            | 1.37E+01       |
| Mitochondrial Dysfunction                                                 | 1.11E+01       |
| Rac Signaling                                                             | 9.97E+00       |
| mTOR Signaling                                                            | 9.59E+00       |
| Remodeling of Epithelial Adherens Junctions                               | 9.40E+00       |
| Opioid Signaling Pathway                                                  | 8.95E+00       |
| Synaptic Long Term Potentiation                                           | 8.66E+00       |
| Regulation of eIF4 and p70S6K Signaling                                   | 8.40E+00       |
| Breast Cancer Regulation by Stathmin1                                     | 8.15E+00       |
| Integrin Signaling                                                        | 8.13E+00       |
| ±-Adrenergic Signaling                                                    | 7.95E+00       |
| Clathrin-mediated Endocytosis Signaling                                   | 7.86E+00       |
| Ephrin Receptor Signaling                                                 | 7.85E+00       |
| Thrombin Signaling                                                        | 7.78E+00       |
| Oxidative Phosphorylation                                                 | 7.73E+00       |
| GNRH Signaling                                                            | 7.55E+00       |
| Chemokine Signaling                                                       | 7.48E+00       |
| 14-3-3-mediated Signaling                                                 | 7.33E+00       |
| Melatonin Signaling                                                       | 7.30E+00       |
| fMLP Signaling in Neutrophils                                             | 7.28E+00       |
| Gap Junction Signaling                                                    | 7.02E+00       |
| Role of NFAT in Cardiac Hypertrophy                                       | 6.93E+00       |
| Signaling by Rho Family GTPases                                           | 6.92E+00       |
| Actin Cytoskeleton Signaling                                              | 6.73E+00       |
| Endocannabinoid Developing Neuron Pathway                                 | 6.62E+00       |
| RhoGDI Signaling                                                          | 6.60E+00       |
| CXCR4 Signaling                                                           | 6.58E+00       |
| Protein Kinase A Signaling                                                | 6.46E+00       |
| Fc $\gamma$ 3 Receptor-mediated Phagocytosis in Macrophages and Monocytes | 6.46E+00       |
| Regulation of Actin-based Motility by Rho                                 | 6.46E+00       |
| Glioma Signaling                                                          | 6.21E+00       |
| CCR3 Signaling in Eosinophils                                             | 6.12E+00       |
| CREB Signaling in Neurons                                                 | 6.08E+00       |
| Protein Ubiquitination Pathway                                            | 5.89E+00       |
| AMPK Signaling                                                            | 5.89E+00       |
| p70S6K Signaling                                                          | 5.86E+00       |
| Virus Entry via Endocytic Pathways                                        | 5.68E+00       |
| Ephrin B Signaling                                                        | 5.66E+00       |
| Glycolysis I                                                              | 5.52E+00       |
| Phagosome Maturation                                                      | 5.51E+00       |
| ERK/MAPK Signaling                                                        | 5.50E+00       |
| Apelin Endothelial Signaling Pathway                                      | 5.26E+00       |
| Germ Cell-Sertoli Cell Junction Signaling                                 | 5.19E+00       |

|                                                     |          |
|-----------------------------------------------------|----------|
| IGF-1 Signaling                                     | 5.17E+00 |
| NRF2-mediated Oxidative Stress Response             | 5.07E+00 |
| Cardiac Hypertrophy Signaling                       | 4.95E+00 |
| G Beta Gamma Signaling                              | 4.93E+00 |
| Actin Nucleation by ARP-WASP Complex                | 4.90E+00 |
| Axonal Guidance Signaling                           | 4.85E+00 |
| Mechanisms of Viral Exit from Host Cells            | 4.81E+00 |
| Insulin Receptor Signaling                          | 4.79E+00 |
| B Cell Receptor Signaling                           | 4.72E+00 |
| Molecular Mechanisms of Cancer                      | 4.54E+00 |
| Renin-Angiotensin Signaling                         | 4.50E+00 |
| Stearate Biosynthesis I (Animals)                   | 4.47E+00 |
| Cholecystokinin/Gastrin-mediated Signaling          | 4.45E+00 |
| Tec Kinase Signaling                                | 4.39E+00 |
| ErbB Signaling                                      | 4.36E+00 |
| LPS-stimulated MAPK Signaling                       | 4.32E+00 |
| IL-8 Signaling                                      | 4.26E+00 |
| Tight Junction Signaling                            | 4.25E+00 |
| Sertoli Cell-Sertoli Cell Junction Signaling        | 4.17E+00 |
| P2Y Purigenic Receptor Signaling Pathway            | 4.12E+00 |
| Caveolar-mediated Endocytosis Signaling             | 4.12E+00 |
| G $\beta$ +q Signaling                              | 4.11E+00 |
| VEGF Signaling                                      | 4.08E+00 |
| Endocannabinoid Neuronal Synapse Pathway            | 4.08E+00 |
| Endocannabinoid Cancer Inhibition Pathway           | 4.07E+00 |
| Neuropathic Pain Signaling In Dorsal Horn Neurons   | 4.03E+00 |
| UVC-Induced MAPK Signaling                          | 4.02E+00 |
| Macropinocytosis Signaling                          | 3.96E+00 |
| Acute Myeloid Leukemia Signaling                    | 3.96E+00 |
| PI3K/AKT Signaling                                  | 3.93E+00 |
| Myc Mediated Apoptosis Signaling                    | 3.88E+00 |
| IL-1 Signaling                                      | 3.87E+00 |
| IL-3 Signaling                                      | 3.81E+00 |
| Epithelial Adherens Junction Signaling              | 3.73E+00 |
| RhoA Signaling                                      | 3.72E+00 |
| FAK Signaling                                       | 3.69E+00 |
| GABA Receptor Signaling                             | 3.69E+00 |
| G-Protein Coupled Receptor Signaling                | 3.67E+00 |
| GM-CSF Signaling                                    | 3.60E+00 |
| Calcium Signaling                                   | 3.59E+00 |
| Phospholipase C Signaling                           | 3.59E+00 |
| nNOS Signaling in Neurons                           | 3.52E+00 |
| Nitric Oxide Signaling in the Cardiovascular System | 3.52E+00 |
| ERK5 Signaling                                      | 3.50E+00 |
| Corticotropin Releasing Hormone Signaling           | 3.48E+00 |
| Semaphorin Signaling in Neurons                     | 3.46E+00 |
| Superpathway of Methionine Degradation              | 3.43E+00 |
| Dopamine-DARPP32 Feedback in cAMP Signaling         | 3.41E+00 |
| Fc Epsilon RI Signaling                             | 3.39E+00 |
| Role of NFAT in Regulation of the Immune Response   | 3.36E+00 |
| 3-phosphoinositide Biosynthesis                     | 3.35E+00 |
| Agrin Interactions at Neuromuscular Junction        | 3.22E+00 |
| PI3K Signaling in B Lymphocytes                     | 3.20E+00 |

|                                                                      |          |
|----------------------------------------------------------------------|----------|
| CDP-diacylglycerol Biosynthesis I                                    | 3.17E+00 |
| Paxillin Signaling                                                   | 3.14E+00 |
| CCR5 Signaling in Macrophages                                        | 3.14E+00 |
| PPAR $\alpha$ /RXR $\alpha$ Activation                               | 3.12E+00 |
| D-myo-inositol (1,4,5,6)-Tetrakisphosphate Biosynthesis              | 3.11E+00 |
| D-myo-inositol (3,4,5,6)-tetrakisphosphate Biosynthesis              | 3.11E+00 |
| G $\beta$ Signaling                                                  | 3.11E+00 |
| Apelin Adipocyte Signaling Pathway                                   | 3.09E+00 |
| HGF Signaling                                                        | 3.06E+00 |
| PAK Signaling                                                        | 3.03E+00 |
| Acyl-CoA Hydrolysis                                                  | 2.99E+00 |
| Phosphatidylglycerol Biosynthesis II (Non-plastidic)                 | 2.97E+00 |
| Adrenomedullin signaling pathway                                     | 2.95E+00 |
| Apelin Cardiomyocyte Signaling Pathway                               | 2.95E+00 |
| Glutamate Receptor Signaling                                         | 2.94E+00 |
| Leukocyte Extravasation Signaling                                    | 2.92E+00 |
| Superpathway of Inositol Phosphate Compounds                         | 2.92E+00 |
| Glutamate Dependent Acid Resistance                                  | 2.86E+00 |
| Cdc42 Signaling                                                      | 2.84E+00 |
| PFKFB4 Signaling Pathway                                             | 2.84E+00 |
| Natural Killer Cell Signaling                                        | 2.80E+00 |
| Glioma Invasiveness Signaling                                        | 2.79E+00 |
| Hypoxia Signaling in the Cardiovascular System                       | 2.79E+00 |
| Cysteine Biosynthesis III (mammalia)                                 | 2.78E+00 |
| Synaptic Long Term Depression                                        | 2.77E+00 |
| Regulation of IL-2 Expression in Activated and Anergic T Lymphocytes | 2.77E+00 |
| Androgen Signaling                                                   | 2.77E+00 |
| 3-phosphoinositide Degradation                                       | 2.71E+00 |
| Erythropoietin Signaling                                             | 2.70E+00 |
| D-myo-inositol-5-phosphate Metabolism                                | 2.68E+00 |
| Antiproliferative Role of Somatostatin Receptor 2                    | 2.66E+00 |
| CDK5 Signaling                                                       | 2.65E+00 |
| Thrombopoietin Signaling                                             | 2.65E+00 |
| Gluconeogenesis I                                                    | 2.62E+00 |
| PTEN Signaling                                                       | 2.59E+00 |
| Xenobiotic Metabolism Signaling                                      | 2.59E+00 |
| Amyloid Processing                                                   | 2.58E+00 |
| UVB-Induced MAPK Signaling                                           | 2.53E+00 |
| GPCR-Mediated Nutrient Sensing in Enteroendocrine Cells              | 2.52E+00 |
| Prolactin Signaling                                                  | 2.51E+00 |
| Amyotrophic Lateral Sclerosis Signaling                              | 2.49E+00 |
| Huntington's Disease Signaling                                       | 2.47E+00 |
| Sucrose Degradation V (Mammalian)                                    | 2.44E+00 |
| ErbB4 Signaling                                                      | 2.44E+00 |
| Relaxin Signaling                                                    | 2.43E+00 |
| Methylglyoxal Degradation I                                          | 2.39E+00 |
| Thiosulfate Disproportionation III (Rhodanese)                       | 2.39E+00 |
| BMP signaling pathway                                                | 2.37E+00 |
| HIPPO signaling                                                      | 2.37E+00 |
| PDGF Signaling                                                       | 2.34E+00 |

|                                                                                |          |
|--------------------------------------------------------------------------------|----------|
| Production of Nitric Oxide and Reactive Oxygen Species in Macrophages          | 2.34E+00 |
| Cardiac Hypertrophy Signaling (Enhanced)                                       | 2.32E+00 |
| Sumoylation Pathway                                                            | 2.30E+00 |
| CD28 Signaling in T Helper Cells                                               | 2.29E+00 |
| Role of Tissue Factor in Cancer                                                | 2.29E+00 |
| T Cell Receptor Signaling                                                      | 2.25E+00 |
| Ovarian Cancer Signaling                                                       | 2.24E+00 |
| Autophagy                                                                      | 2.14E+00 |
| Induction of Apoptosis by HIV1                                                 | 2.14E+00 |
| Ephrin A Signaling                                                             | 2.12E+00 |
| Melanocyte Development and Pigmentation Signaling                              | 2.09E+00 |
| Methionine Degradation I (to Homocysteine)                                     | 2.09E+00 |
| White Adipose Tissue Browning Pathway                                          | 2.06E+00 |
| Neuregulin Signaling                                                           | 2.03E+00 |
| Cell Cycle: G2/M DNA Damage Checkpoint Regulation                              | 2.03E+00 |
| IL-17 Signaling                                                                | 2.02E+00 |
| Renal Cell Carcinoma Signaling                                                 | 2.02E+00 |
| Cellular Effects of Sildenafil (Viagra)                                        | 2.01E+00 |
| ErbB2-ErbB3 Signaling                                                          | 1.99E+00 |
| TCA Cycle II (Eukaryotic)                                                      | 1.96E+00 |
| NF- $\kappa$ B Activation by Viruses                                           | 1.96E+00 |
| cAMP-mediated signaling                                                        | 1.96E+00 |
| Apoptosis Signaling                                                            | 1.95E+00 |
| ILK Signaling                                                                  | 1.92E+00 |
| HER-2 Signaling in Breast Cancer                                               | 1.90E+00 |
| VEGF Family Ligand-Receptor Interactions                                       | 1.90E+00 |
| Glutamate Degradation III (via 4-aminobutyrate)                                | 1.89E+00 |
| Trans, trans-farnesyl Diphosphate Biosynthesis                                 | 1.89E+00 |
| PKC $\delta$ Signaling in T Lymphocytes                                        | 1.88E+00 |
| Role of Macrophages, Fibroblasts and Endothelial Cells in Rheumatoid Arthritis | 1.88E+00 |
| Colorectal Cancer Metastasis Signaling                                         | 1.86E+00 |
| tRNA Charging                                                                  | 1.85E+00 |
| Aldosterone Signaling in Epithelial Cells                                      | 1.82E+00 |
| Cardiac $\beta$ -adrenergic Signaling                                          | 1.81E+00 |
| Neuroinflammation Signaling Pathway                                            | 1.77E+00 |
| Superpathway of Cholesterol Biosynthesis                                       | 1.72E+00 |
| Parkinson's Signaling                                                          | 1.70E+00 |
| Glioblastoma Multiforme Signaling                                              | 1.69E+00 |
| Cancer Drug Resistance By Drug Efflux                                          | 1.69E+00 |
| Oncostatin M Signaling                                                         | 1.68E+00 |
| GDNF Family Ligand-Receptor Interactions                                       | 1.65E+00 |
| Neurotrophin/TRK Signaling                                                     | 1.65E+00 |
| CNTF Signaling                                                                 | 1.63E+00 |
| Endometrial Cancer Signaling                                                   | 1.63E+00 |
| Superpathway of Geranylgeranyldiphosphate Biosynthesis I (via Mevalonate)      | 1.63E+00 |
| Dopamine Receptor Signaling                                                    | 1.62E+00 |
| Reelin Signaling in Neurons                                                    | 1.59E+00 |
| Role of MAPK Signaling in the Pathogenesis of Influenza                        | 1.59E+00 |
| NGF Signaling                                                                  | 1.58E+00 |

|                                                                                 |          |
|---------------------------------------------------------------------------------|----------|
| Salvage Pathways of Pyrimidine Ribonucleotides                                  | 1.56E+00 |
| Methylglyoxal Degradation III                                                   | 1.56E+00 |
| 4-1BB Signaling in T Lymphocytes                                                | 1.53E+00 |
| RAR Activation                                                                  | 1.53E+00 |
| Sphingosine-1-phosphate Signaling                                               | 1.52E+00 |
| PEDF Signaling                                                                  | 1.49E+00 |
| Netrin Signaling                                                                | 1.48E+00 |
| Pyridoxal 5'-phosphate Salvage Pathway                                          | 1.48E+00 |
| GP6 Signaling Pathway                                                           | 1.48E+00 |
| Superoxide Radicals Degradation                                                 | 1.48E+00 |
| Calcium-induced T Lymphocyte Apoptosis                                          | 1.45E+00 |
| Regulation of Cellular Mechanics by Calpain Protease                            | 1.45E+00 |
| eNOS Signaling                                                                  | 1.45E+00 |
| Inhibition of Angiogenesis by TSP1                                              | 1.44E+00 |
| Melanoma Signaling                                                              | 1.43E+00 |
| Adenine and Adenosine Salvage VI                                                | 1.43E+00 |
| D-mannose Degradation                                                           | 1.43E+00 |
| Glutamine Biosynthesis I                                                        | 1.43E+00 |
| Sulfite Oxidation IV                                                            | 1.43E+00 |
| Sperm Motility                                                                  | 1.43E+00 |
| Thyroid Cancer Signaling                                                        | 1.40E+00 |
| SPINK1 General Cancer Pathway                                                   | 1.37E+00 |
| Systemic Lupus Erythematosus In T Cell Signaling Pathway                        | 1.35E+00 |
| HMGB1 Signaling                                                                 | 1.35E+00 |
| G $\beta$ $\pm$ s Signaling                                                     | 1.34E+00 |
| Endothelin-1 Signaling                                                          | 1.34E+00 |
| Glucocorticoid Receptor Signaling                                               | 1.33E+00 |
| IL-15 Signaling                                                                 | 1.32E+00 |
| Calcium Transport I                                                             | 1.29E+00 |
| Prostate Cancer Signaling                                                       | 1.28E+00 |
| Superpathway of D-myo-inositol (1,4,5)-trisphosphate Metabolism                 | 1.28E+00 |
| GPCR-Mediated Integration of Enteroendocrine Signaling Exemplified by an L Cell | 1.27E+00 |
| Non-Small Cell Lung Cancer Signaling                                            | 1.27E+00 |
| G $\beta$ $\pm$ 12/13 Signaling                                                 | 1.27E+00 |
| Estrogen-Dependent Breast Cancer Signaling                                      | 1.25E+00 |
| IL-12 Signaling and Production in Macrophages                                   | 1.24E+00 |
| $\dot{\text{I}}^3$ -glutamyl Cycle                                              | 1.22E+00 |
| Angiopoietin Signaling                                                          | 1.22E+00 |
| Triacylglycerol Biosynthesis                                                    | 1.19E+00 |
| Tryptophan Degradation X (Mammalian, via Tryptamine)                            | 1.19E+00 |
| TGF- $\dot{\text{I}}^2$ Signaling                                               | 1.18E+00 |
| Guanosine Nucleotides Degradation III                                           | 1.15E+00 |
| Antiproliferative Role of TOB in T Cell Signaling                               | 1.15E+00 |
| Apelin Liver Signaling Pathway                                                  | 1.15E+00 |
| Lipid Antigen Presentation by CD1                                               | 1.15E+00 |
| NAD Salvage Pathway II                                                          | 1.15E+00 |
| 4-hydroxyproline Degradation I                                                  | 1.14E+00 |
| Asparagine Degradation I                                                        | 1.14E+00 |
| Cysteine Biosynthesis/Homocysteine Degradation                                  | 1.14E+00 |
| Fatty Acid Biosynthesis Initiation II                                           | 1.14E+00 |

|                                                             |          |
|-------------------------------------------------------------|----------|
| Formaldehyde Oxidation II (Glutathione-dependent)           | 1.14E+00 |
| L-cysteine Degradation III                                  | 1.14E+00 |
| L-glutamine Biosynthesis II (tRNA-dependent)                | 1.14E+00 |
| Palmitate Biosynthesis I (Animals)                          | 1.14E+00 |
| IL-2 Signaling                                              | 1.12E+00 |
| Apelin Pancreas Signaling Pathway                           | 1.10E+00 |
| Mevalonate Pathway I                                        | 1.09E+00 |
| Urate Biosynthesis/Inosine 5'-phosphate Degradation         | 1.09E+00 |
| Type II Diabetes Mellitus Signaling                         | 1.08E+00 |
| FLT3 Signaling in Hematopoietic Progenitor Cells            | 1.06E+00 |
| Role of PI3K/AKT Signaling in the Pathogenesis of Influenza | 1.05E+00 |
| Chronic Myeloid Leukemia Signaling                          | 1.05E+00 |
| Mouse Embryonic Stem Cell Pluripotency                      | 1.05E+00 |
| Role of p14/p19ARF in Tumor Suppression                     | 1.04E+00 |
| IL-6 Signaling                                              | 1.03E+00 |
| CD40 Signaling                                              | 1.03E+00 |
| Glutaryl-CoA Degradation                                    | 1.03E+00 |
| Phenylalanine Degradation IV (Mammalian, via Side Chain)    | 1.03E+00 |
| Sonic Hedgehog Signaling                                    | 1.01E+00 |
| Adenosine Nucleotides Degradation II                        | 9.78E-01 |
| 5-aminoimidazole Ribonucleotide Biosynthesis I              | 9.69E-01 |
| Aspartate Biosynthesis                                      | 9.69E-01 |
| Geranylgeranyldiphosphate Biosynthesis                      | 9.69E-01 |
| Glutamate Degradation II                                    | 9.69E-01 |
| NADH Repair                                                 | 9.69E-01 |
| Proline Degradation                                         | 9.69E-01 |
| S-adenosyl-L-methionine Biosynthesis                        | 9.69E-01 |
| RANK Signaling in Osteoclasts                               | 9.63E-01 |
| Crosstalk between Dendritic Cells and Natural Killer Cells  | 9.46E-01 |
| Granzyme B Signaling                                        | 9.31E-01 |
| Vitamin-C Transport                                         | 9.31E-01 |
| Growth Hormone Signaling                                    | 9.08E-01 |
| D-myo-inositol (1,4,5)-trisphosphate Degradation            | 8.87E-01 |
| Ubiquinol-10 Biosynthesis (Eukaryotic)                      | 8.87E-01 |
| $\Delta^3$ -linolenate Biosynthesis II (Animals)            | 8.87E-01 |
| Acute Phase Response Signaling                              | 8.84E-01 |
| CD27 Signaling in Lymphocytes                               | 8.75E-01 |
| Iron homeostasis signaling pathway                          | 8.60E-01 |
| Noradrenaline and Adrenaline Degradation                    | 8.55E-01 |
| Role of IL-17A in Arthritis                                 | 8.54E-01 |
| Leptin Signaling in Obesity                                 | 8.53E-01 |
| Arginine Degradation I (Arginase Pathway)                   | 8.52E-01 |
| Ascorbate Recycling (Cytosolic)                             | 8.52E-01 |
| Glutathione Redox Reactions II                              | 8.52E-01 |
| Heme Biosynthesis from Uroporphyrinogen-III I               | 8.52E-01 |
| Heme Degradation                                            | 8.52E-01 |
| L-cysteine Degradation I                                    | 8.52E-01 |
| Melatonin Degradation II                                    | 8.52E-01 |
| Molybdenum Cofactor Biosynthesis                            | 8.52E-01 |
| Spermine and Spermidine Degradation I                       | 8.52E-01 |
| 1D-myo-inositol Hexakisphosphate Biosynthesis II            | 8.46E-01 |

|                                                             |          |
|-------------------------------------------------------------|----------|
| (Mammalian)                                                 |          |
| D-myo-inositol (1,3,4)-trisphosphate Biosynthesis           | 8.46E-01 |
| FAT10 Signaling Pathway                                     | 8.46E-01 |
| Purine Nucleotides Degradation II (Aerobic)                 | 8.46E-01 |
| Fc $\gamma$ RIIB Signaling in B Lymphocytes                 | 8.36E-01 |
| Systemic Lupus Erythematosus In B Cell Signaling Pathway    | 8.36E-01 |
| EGF Signaling                                               | 8.33E-01 |
| Bladder Cancer Signaling                                    | 8.18E-01 |
| Role of NANOG in Mammalian Embryonic Stem Cell Pluripotency | 8.12E-01 |
| UVA-Induced MAPK Signaling                                  | 8.04E-01 |
| IL-7 Signaling Pathway                                      | 7.86E-01 |
| Granzyme A Signaling                                        | 7.72E-01 |
| The Visual Cycle                                            | 7.72E-01 |
| Creatine-phosphate Biosynthesis                             | 7.64E-01 |
| Myo-inositol Biosynthesis                                   | 7.64E-01 |
| JAK/Stat Signaling                                          | 7.54E-01 |
| Regulation of the Epithelial-Mesenchymal Transition Pathway | 7.40E-01 |
| Endoplasmic Reticulum Stress Pathway                        | 7.39E-01 |
| Putrescine Degradation III                                  | 7.39E-01 |
| Phagosome Formation                                         | 7.37E-01 |
| PPAR Signaling                                              | 7.22E-01 |
| B Cell Activating Factor Signaling                          | 7.12E-01 |
| nNOS Signaling in Skeletal Muscle Cells                     | 7.12E-01 |
| Polyamine Regulation in Colon Cancer                        | 7.08E-01 |
| Tryptophan Degradation III (Eukaryotic)                     | 7.08E-01 |
| TR/RXR Activation                                           | 6.95E-01 |
| GDP-mannose Biosynthesis                                    | 6.92E-01 |
| Lactose Degradation III                                     | 6.92E-01 |
| Pyruvate Fermentation to Lactate                            | 6.92E-01 |
| Telomerase Signaling                                        | 6.84E-01 |
| IL-4 Signaling                                              | 6.81E-01 |
| Ethanol Degradation IV                                      | 6.79E-01 |
| IL-17A Signaling in Airway Cells                            | 6.70E-01 |
| BAG2 Signaling Pathway                                      | 6.70E-01 |
| Pancreatic Adenocarcinoma Signaling                         | 6.60E-01 |
| IL-22 Signaling                                             | 6.51E-01 |
| Ceramide Signaling                                          | 6.41E-01 |
| iCOS-iCOSL Signaling in T Helper Cells                      | 6.36E-01 |
| Acetyl-CoA Biosynthesis I (Pyruvate Dehydrogenase Complex)  | 6.33E-01 |
| Aspartate Degradation II                                    | 6.33E-01 |
| Thioredoxin Pathway                                         | 6.33E-01 |
| STAT3 Pathway                                               | 6.26E-01 |
| D-myo-inositol (1,4,5)-Trisphosphate Biosynthesis           | 6.25E-01 |
| IL-17A Signaling in Gastric Cells                           | 6.25E-01 |
| Role of JAK family kinases in IL-6-type Cytokine Signaling  | 6.25E-01 |
| HIF1 $\alpha$ Signaling                                     | 6.14E-01 |
| Death Receptor Signaling                                    | 6.03E-01 |
| IL-10 Signaling                                             | 5.96E-01 |
| Role of JAK1 and JAK3 in $\hat{I}^3c$ Cytokine Signaling    | 5.96E-01 |

|                                                            |          |
|------------------------------------------------------------|----------|
| Neuroprotective Role of THOP1 in Alzheimer's Disease       | 5.82E-01 |
| Factors Promoting Cardiogenesis in Vertebrates             | 5.79E-01 |
| Heme Biosynthesis II                                       | 5.40E-01 |
| Leucine Degradation I                                      | 5.40E-01 |
| Phosphatidylethanolamine Biosynthesis II                   | 5.40E-01 |
| Prostanoid Biosynthesis                                    | 5.40E-01 |
| Dopamine Degradation                                       | 5.13E-01 |
| Toll-like Receptor Signaling                               | 5.06E-01 |
| Phototransduction Pathway                                  | 5.03E-01 |
| Dolichyl-diphosphooligosaccharide Biosynthesis             | 5.02E-01 |
| Ketogenesis                                                | 5.02E-01 |
| G Protein Signaling Mediated by Tubby                      | 4.94E-01 |
| VDR/RXR Activation                                         | 4.83E-01 |
| SAPK/JNK Signaling                                         | 4.83E-01 |
| Ethanol Degradation II                                     | 4.76E-01 |
| Fatty Acid $\beta$ -oxidation I                            | 4.76E-01 |
| Purine Nucleotides De Novo Biosynthesis II                 | 4.68E-01 |
| Role of BRCA1 in DNA Damage Response                       | 4.61E-01 |
| NF- $\kappa$ B Signaling                                   | 4.59E-01 |
| Cleavage and Polyadenylation of Pre-mRNA                   | 4.38E-01 |
| Glycogen Degradation II                                    | 4.38E-01 |
| IL-17A Signaling in Fibroblasts                            | 4.26E-01 |
| Hepatic Cholestasis                                        | 4.25E-01 |
| FGF Signaling                                              | 4.20E-01 |
| SPINK1 Pancreatic Cancer Pathway                           | 4.14E-01 |
| Assembly of RNA Polymerase III Complex                     | 4.11E-01 |
| Cholesterol Biosynthesis I                                 | 4.11E-01 |
| Cholesterol Biosynthesis II (via 24,25-dihydrolanosterol)  | 4.11E-01 |
| Cholesterol Biosynthesis III (via Desmosterol)             | 4.11E-01 |
| Fatty Acid Activation                                      | 4.11E-01 |
| NAD Phosphorylation and Dephosphorylation                  | 4.11E-01 |
| Oleate Biosynthesis II (Animals)                           | 4.11E-01 |
| Type I Diabetes Mellitus Signaling                         | 4.03E-01 |
| PCP pathway                                                | 4.02E-01 |
| Estrogen Receptor Signaling                                | 3.99E-01 |
| Wnt/Ca <sup>+</sup> pathway                                | 3.91E-01 |
| Colanic Acid Building Blocks Biosynthesis                  | 3.86E-01 |
| Glycogen Degradation III                                   | 3.86E-01 |
| Docosahexaenoic Acid (DHA) Signaling                       | 3.82E-01 |
| Hereditary Breast Cancer Signaling                         | 3.77E-01 |
| CTLA4 Signaling in Cytotoxic T Lymphocytes                 | 3.75E-01 |
| April Mediated Signaling                                   | 3.69E-01 |
| PXR/RXR Activation                                         | 3.61E-01 |
| Estrogen Biosynthesis                                      | 3.44E-01 |
| Role of PKR in Interferon Induction and Antiviral Response | 3.44E-01 |
| LPS/IL-1 Mediated Inhibition of RXR Function               | 3.44E-01 |
| Chondroitin Sulfate Degradation (Metazoa)                  | 3.43E-01 |
| Extrinsic Prothrombin Activation Pathway                   | 3.43E-01 |
| Serotonin Degradation                                      | 3.41E-01 |
| MIF Regulation of Innate Immunity                          | 3.32E-01 |
| Pyrimidine Ribonucleotides Interconversion                 | 3.32E-01 |

|                                                                              |          |
|------------------------------------------------------------------------------|----------|
| IL-15 Production                                                             | 3.29E-01 |
| Histamine Degradation                                                        | 3.24E-01 |
| Mitochondrial L-carnitine Shuttle Pathway                                    | 3.24E-01 |
| RAN Signaling                                                                | 3.24E-01 |
| Serotonin Receptor Signaling                                                 | 3.21E-01 |
| Systemic Lupus Erythematosus Signaling                                       | 3.15E-01 |
| Pyrimidine Ribonucleotides De Novo Biosynthesis                              | 3.10E-01 |
| Role of IL-17F in Allergic Inflammatory Airway Diseases                      | 2.99E-01 |
| iNOS Signaling                                                               | 2.99E-01 |
| Role of Pattern Recognition Receptors in Recognition of Bacteria and Viruses | 2.92E-01 |
| Apelin Muscle Signaling Pathway                                              | 2.90E-01 |
| Oxidative Ethanol Degradation III                                            | 2.90E-01 |
| FAT10 Cancer Signaling Pathway                                               | 2.89E-01 |
| Fatty Acid $\beta$ -oxidation                                                | 2.75E-01 |
| TNFR1 Signaling                                                              | 2.53E-01 |
| Antioxidant Action of Vitamin C                                              | 2.48E-01 |
| Pyrimidine Deoxyribonucleotides De Novo Biosynthesis I                       | 2.48E-01 |
| Apelin Cardiac Fibroblast Signaling Pathway                                  | 2.36E-01 |
| Lymphotoxin $\beta$ Receptor Signaling                                       | 2.29E-01 |
| Glutathione Redox Reactions I                                                | 2.24E-01 |
| Tumoricidal Function of Hepatic Natural Killer Cells                         | 2.24E-01 |
| ATM Signaling                                                                | 0.00E+00 |
| Acetone Degradation I (to Methylglyoxal)                                     | 0.00E+00 |
| Activation of IRF by Cytosolic Pattern Recognition Receptors                 | 0.00E+00 |
| Adipogenesis pathway                                                         | 0.00E+00 |
| Agranulocyte Adhesion and Diapedesis                                         | 0.00E+00 |
| Antigen Presentation Pathway                                                 | 0.00E+00 |
| Aryl Hydrocarbon Receptor Signaling                                          | 0.00E+00 |
| Atherosclerosis Signaling                                                    | 0.00E+00 |
| Basal Cell Carcinoma Signaling                                               | 0.00E+00 |
| Cell Cycle: G1/S Checkpoint Regulation                                       | 0.00E+00 |
| Chondroitin Sulfate Biosynthesis                                             | 0.00E+00 |
| Chondroitin Sulfate Biosynthesis (Late Stages)                               | 0.00E+00 |
| Circadian Rhythm Signaling                                                   | 0.00E+00 |
| Coagulation System                                                           | 0.00E+00 |
| Cyclins and Cell Cycle Regulation                                            | 0.00E+00 |
| Cytotoxic T Lymphocyte-mediated Apoptosis of Target Cells                    | 0.00E+00 |
| Dendritic Cell Maturation                                                    | 0.00E+00 |
| Dermatan Sulfate Biosynthesis                                                | 0.00E+00 |
| Dermatan Sulfate Biosynthesis (Late Stages)                                  | 0.00E+00 |
| FXR/RXR Activation                                                           | 0.00E+00 |
| Granulocyte Adhesion and Diapedesis                                          | 0.00E+00 |
| Gustation Pathway                                                            | 0.00E+00 |
| HOTAIR Regulatory Pathway                                                    | 0.00E+00 |
| Heparan Sulfate Biosynthesis                                                 | 0.00E+00 |
| Heparan Sulfate Biosynthesis (Late Stages)                                   | 0.00E+00 |
| Human Embryonic Stem Cell Pluripotency                                       | 0.00E+00 |
| LXR/RXR Activation                                                           | 0.00E+00 |
| MIF-mediated Glucocorticoid Regulation                                       | 0.00E+00 |



|           |                                                                                                                                                                                                                                                                                                                                                                                                                                                                                                          |
|-----------|----------------------------------------------------------------------------------------------------------------------------------------------------------------------------------------------------------------------------------------------------------------------------------------------------------------------------------------------------------------------------------------------------------------------------------------------------------------------------------------------------------|
| Network 3 | <p>Associated network functions: Developmental Disorder, Neurological Disease, Organismal Injury and Abnormalities</p> <p>Number of “focus molecules” contained in the network: 30</p> <p>IPA p-score: 42</p> <p>Network proteins: 14-3-3<br/>(Î²,Î¼,Î¶),ACTB,ATAT1,C2orf72,CD81,DCPS,EEF1A1,EMD,Gm10358,HIST1H1C,HTRA2,IFN</p>                                                                                                                                                                          |
| Network 4 | <p>Associated network functions: Protein Synthesis, Cellular Compromise, Inflammatory Response</p> <p>Number of “focus molecules” contained in the network: 29</p> <p>IPA p-score: 39</p> <p>Network proteins:<br/>ARSB,CPED1,CROCC,CST3,CTSA,CTSZ,Cathepsin,ENDOD1,ERGIC1,Ephb,FIS1,GLB1,Glycoprotein</p>                                                                                                                                                                                               |
| Network 5 | <p>Associated network functions: Cellular Movement, Molecular Transport, Developmental Disorder</p> <p>Number of “focus molecules” contained in the network: 29</p> <p>IPA p-score: 39</p> <p>Network proteins: 14-3-3(Î²,Î³,Î±,Î¶),14-3-3(Î±,Î¶),ANXA3,ATAD3A,CA2,CA4,CADM3,CALB1,CLNS1A,CYFIP2,EPB41L2,EPB41L3, FN3KRP,IDI1,IGSF21,IMPA1,Integrin alpha 3 beta 1,KCNMA1,LIN7A,MARK1,MPC1,MPC2,MPP1,MPP2,NPL,PLL,PLPP3,SARNP,SERPINB6, SLC4A4,TLR7/8,Vegf,WDR45,YWHAH,c- Src</p>                        |
| Network 6 | <p>Associated network functions: RNA Post-Transcriptional Modification, Cellular Assembly and Organization, RNA Trafficking</p> <p>Number of “focus molecules” contained in the network: 29</p> <p>IPA p-score: 39</p> <p>Network proteins:<br/>AIMP1,ARHGEF2,ASPA,Akr1b7,Bola2,C11orf58,CDK4/6,CIAPIN1,CIT,Cadherin,DARS,DEC R1,FAM120A,GGCT,GGPS1,GTPase,Hnrnpa3,IARS,IMPACT,Ktn1,LARS,MYL12A,Nuclear factor 1,OSGEP,PKP4,RHOA,RRAS2,SLC25A22,SLC44A1,STMN3,SWI-SNF,TSNAX,VCPIP1,Wasl,aminoacylase</p> |
| Network 7 | <p>Associated network functions: Cellular Assembly and Organization, Cell Morphology, Cellular Function and Maintenance</p> <p>Number of “focus molecules” contained in the network: 29</p> <p>IPA p-score: 39</p> <p>Network proteins:<br/>ARMCX3,ATG,ATG5,ATG9A,CALCOCO1,CAVIN1,CFAP57,EEF1A2,ERLIN2,EXOC1,Fgfr, GABARAPL2,GBA,GRIPAP1,HCCS,IntegrinÎ²,MAP1LC3,MAP1LC3A,PITHD1,PTK2,RAB14, RAB1A,RAB21,RAB2A,RAB7A,RHOT1,RPRD1A,RPRD1B,SNX1,Srebp,UFD1,VPS26B,VPS29,WDFY3,collagen type i (family)</p> |

|            |                                                                                                                                                                                                                                                                                                                                                                                                                                                                                                                   |
|------------|-------------------------------------------------------------------------------------------------------------------------------------------------------------------------------------------------------------------------------------------------------------------------------------------------------------------------------------------------------------------------------------------------------------------------------------------------------------------------------------------------------------------|
| Network 8  | <p>Associated network functions: Lipid Metabolism, Nucleic Acid Metabolism, Small Molecule Biochemistry</p> <p>Number of “focus molecules” contained in the network: 29</p> <p>IPA p-score: 39</p> <p>Network proteins:<br/>ACOT11,ACOT7,ACOT9,AHSA1,ALDOA,ALDOC,CLPB,DBI,DDX1,DNM1L,EGLN,EXO,G<br/>RHPR,Hif1,IDH1,IDH3B,Insulin,LDHA,LZTFL1,MPI,PGK1,PPT1,PSMA3,Pgk,RAB1B,RAB35,<br/>RTCB,RTRAF,Rp132,S100A14,SLC16A1,THSD7A,TPI1,acyl-CoA hydrolase,palmitoyl-CoA<br/>hydrolase</p>                             |
| Network 9  | <p>Associated network functions: Cellular Assembly and Organization, Infectious Diseases, Cell Morphology</p> <p>Number of “focus molecules” contained in the network: 28</p> <p>IPA p-score: 37</p> <p>Network proteins:<br/>AK1,Ant,CMTM5,COPA,COPB2,COPE,ENAH,FAM192A,GIPC1,GRPEL1,H1F0,KRT77,Mapk,<br/>Mpt</p>                                                                                                                                                                                                |
| Network 10 | <p>Associated network functions: Protein Synthesis, RNA Damage and Repair, Cancer</p> <p>Number of “focus molecules” contained in the network: 28</p> <p>IPA p-score: 37</p> <p>Network proteins: 60S ribosomal</p>                                                                                                                                                                                                                                                                                               |
| Network 11 | <p>Associated network functions: Infectious Diseases, Organismal Injury and Abnormalities, Neurological Disease</p> <p>Number of “focus molecules” contained in the network: 27</p> <p>IPA p-score: 35</p> <p>Network proteins:<br/>AIP,ATXN10,BASP1,CACYBP,CENPV,Complement,DNAJB2,DNAJB6,DNAJC3,DNAJC8,FA<br/>RSA,FYN,HSP,HSPA12A,Hdac,Hsp22/Hsp40/Hsp90,Hsp70,Hsp90,LACTB,MHC Class II<br/>(complex),MLF2,MPST,MRPS16,MYO18A,NBEA,POLDIP2,PPP1R12A,PTGES3,RNH1,SMYD<br/>5,SYNPO,TMEM132A,TUBA1C,Tlr,YTHDF3</p> |
| Network 12 | <p>Associated network functions: Post-Translational Modification, Cellular Development, Cellular Growth and Proliferation</p> <p>Number of “focus molecules” contained in the network: 26</p> <p>IPA p-score: 33</p> <p>Network proteins: 19S<br/>proteasome,ANKS1B,ASRGL1,CLASP2,Cops2,GSK3B,Immunoproteasome<br/>Pa28/20s,LXN,METTL7A,MOB1B,NT5DC3,P</p>                                                                                                                                                        |

|            |                                                                                                                                                                                                                                                                                                                                                                                                                                                                                                                            |
|------------|----------------------------------------------------------------------------------------------------------------------------------------------------------------------------------------------------------------------------------------------------------------------------------------------------------------------------------------------------------------------------------------------------------------------------------------------------------------------------------------------------------------------------|
|            | glycoprotein,PDP1,PPP1R2,PRXL2A,PSMB,PSMB2,PSMB3,PSMD,PSMD13,Pdi,Proteasome PA700/20s,RTN1,Rbx1,TRIM3,TUBAL3,UBE2,UBE2D2,UBE2E2,UBE2J1,UBE2M,UBE2O,UBE2R2,UBE2V2,Ubiquitin                                                                                                                                                                                                                                                                                                                                                 |
| Network 13 | <p>Associated network functions: RNA Damage and Repair, Cancer, Cell Death and Survival</p> <p>Number of “focus molecules” contained in the network: 26</p> <p>IPA p-score: 33</p> <p>Network proteins: Atrial Natriuretic Peptide,CCAR2,CTNND1,FTO,Fcer1,GSK3A,HAGH,HLA-DR,HNRNPC,HSD17B4,KIF5B,MAGOH,P-TEFb,PI3K (family),PI3K p85,PPM1A,RALY,RPS11,RPS13,RPS15A,RPS17,RPS18,RPS25,RPS7,RPS8,Rac,Rsk,SF3A1,SF3A3,SF3B1,SNRNP40,SNRPF,SNRPN,Srsf5,snRNP</p>                                                               |
| Network 14 | <p>Associated network functions: Cellular Function and Maintenance, Small Molecule Biochemistry, Molecular Transport</p> <p>Number of “focus molecules” contained in the network: 25</p> <p>IPA p-score: 31</p> <p>Network proteins: AAK1,AP2S1,ATP1A2,ATP1A3,ATP1A4,ATP1B1,ATP1B2,Ap2 alpha,Ap2b1,Beta adaptin,CADPS,CAPRIN1,CPOX,CYFIP1,ERK1/2,FXYD7,GABA receptor,GABA-A receptor,GABRB2,GABRG2,GPHN,ITPR,ITSN1,MLC1,NWASP,Na+,K+ - ATPase,Na-k-atpase,Ncx,PHACTR1,RAB11FIP2,SGIP1,SNAP91,SV2A,TPD52L2,WNK2</p>         |
| Network 15 | <p>Associated network functions: Developmental Disorder, Hereditary Disorder, Metabolic Disease</p> <p>Number of “focus molecules” contained in the network: 25</p> <p>IPA p-score: 31</p> <p>Network proteins: ADK,Akt,CNTN2,Cytochrome bc1,DIP2A,FBXO2,GLO1,Hif,IBA57,KCNA1,LGI1,MCU,MT-ND3,Mitochondrial complex 1,NADH dehydrogenase,NDUFA12,NDUFB4,NDUFB6,NDUFV1,NFASC,OPCML,Oxphos,PDGF-DD,PDK,PDK3,RMDN3,SCN2A,SLC17A7,SPTBN4,UQCRC1,UQCRC2,UQCRFS1,UQCRHL, pyruvate dehydrogenase,voltage-gated sodium channel</p> |
| Network 16 | <p>Associated network functions: Carbohydrate Metabolism, Small Molecule Biochemistry, Cell Morphology</p> <p>Number of “focus molecules” contained in the network: 25</p> <p>IPA p-score: 31</p> <p>Network proteins: 6-phosphofructokinase,AIDA,ARF3,ARF6,Adaptor protein 1,Angiotensin II receptor type 1,Arf,BTBD8,COP I,COPG1,DDAH1,Dgk,ECHDC1,ELMOD1,FSD1,GGA1,GGA3,HMGCS1,IL-1R,Jnk,MKK1/4,MTCH1,NCLN,NUDC,PFKL,PFKM,PFKP,PYGB,RABGAP1,SLC1A2,SLK,SYNRG,TSPAN2,WIPI2,phosphofructokinase</p>                        |
| Network 17 | <p>Associated network functions: Post-Translational Modification, Gene Expression, RNA Damage and Repair</p>                                                                                                                                                                                                                                                                                                                                                                                                               |

|            |                                                                                                                                                                                                                                                                                                                                                                                                                                                                                                                                                                         |
|------------|-------------------------------------------------------------------------------------------------------------------------------------------------------------------------------------------------------------------------------------------------------------------------------------------------------------------------------------------------------------------------------------------------------------------------------------------------------------------------------------------------------------------------------------------------------------------------|
|            | <p>Number of “focus molecules” contained in the network: 24</p> <p>IPA p-score: 29</p> <p>Network proteins: 20s proteasome,26s Proteasome,ABRAXAS2,ATPase,Alpha</p>                                                                                                                                                                                                                                                                                                                                                                                                     |
| Network 18 | <p>Associated network functions: Cardiovascular System Development and Function, Organ Development, Cellular Assembly and Organization</p> <p>Number of “focus molecules” contained in the network: 23</p> <p>IPA p-score:27</p> <p>Network proteins: ACP1,ARHGDI A,Calcineurin A,Ck2,EPHX2,Histone H1,IGBP1,IPO7,Importin alpha,Importin beta,KIFAP3,NUDT5,PFK,PLP1,PPFIA2,PPFIA3,PPM1H,PPP1R13B,PPP1R1A,PPP1R7,PPP3CA,PRKACB,PTPN23,Pdgf (complex),Pp1c,RAN,RIMS3,RPS6KB1,Ras homolog,S100A13,SYNJ1,VPS25,amylase,cAMP-dependent protein kinase,phosphatase</p>       |
| Network 19 | <p>Associated network functions: Protein Synthesis, Cardiac Arrhythmia, Cardiovascular Disease</p> <p>Number of “focus molecules” contained in the network: 22</p> <p>IPA p-score: 26</p> <p>Network proteins: API5,ARHGAP35,ATP6V1C1,ATXN2L,CFDP1,CRTC1,DPP6,EIF3,EIF3J,EIF3M,EIF4A,EIF4A1,EIF4F,EIF4G3,ERK,Eif4g,IDH3G,KHSRP,MATR3,NADP Isocitrate</p>                                                                                                                                                                                                                |
| Network 20 | <p>Associated network functions: Cell Signaling, Cellular Assembly and Organization, Energy Production</p> <p>Number of “focus molecules” contained in the network: 22</p> <p>IPA p-score: 26</p> <p>Network proteins: ABI-2-CYFIP2-HSPC300-NCKAP1-WAVE,ABI2,ABR,ARHGAP44,ARHGEF,ATP synthase,ATP5MF,ATP5PB,ATP5PD,ATP5PO,ATP6AP1,ATP6V0A1,ATP6V1H,BRK1,CPNE1,Diap,Enolase,Erm,F0 ATP synthase,H+-transporting two-sector ATPase,HACD3,KIAA1217,LAMTOR5,NCKAP1,NDUFS3,PIP5K,PITPNM2,RAC1,RRAGB,Rho gdi,TENM4,TSM,Vacuolar H+ ATPase,adenosine-tetraphosphatase,aldo</p> |
| Network 21 | <p>Associated network functions: Cell Cycle, Renal and Urological System Development and Function, Embryonic Development</p> <p>Number of “focus molecules” contained in the network: 22</p> <p>IPA p-score: 26</p> <p>Network proteins: AHCY,AHCYL1,AHCYL2,AMPK,APC,BORCS5,CD34,CDS2,CLIP1,COQ3,CS,CTBP1,Cyclin A,Cyclin D,Cyclin E,E2f,GCN1,GJA1,GRN,HDL,IDH2,IL12</p>                                                                                                                                                                                                |

|            |                                                                                                                                                                                                                                                                                                                                                                                                                                                                                                                                                  |
|------------|--------------------------------------------------------------------------------------------------------------------------------------------------------------------------------------------------------------------------------------------------------------------------------------------------------------------------------------------------------------------------------------------------------------------------------------------------------------------------------------------------------------------------------------------------|
|            | (family),MCCC2,PA2G4,PAFAH1B1,PRKAB2,RPS4Y1,Rb,SYNE1,TCF,TMED7,adenosylhomo cysteinase,glutathione peroxidase,mediator,succinate dehydrogenase                                                                                                                                                                                                                                                                                                                                                                                                   |
| Network 22 | <p>Associated network functions: Drug Metabolism, Molecular Transport, Lipid Metabolism</p> <p>Number of “focus molecules” contained in the network: 21</p> <p>IPA p-score: 24</p> <p>Network proteins: ABCB1,AP2M1,ATP8A1,ATP9A,Actin,Adaptor protein,Adaptor protein 2,Ap1 gamma,Ap2,Beta Arrestin,CAB39L,CLTC,Clathrin,Endophilin,FBXL16,GRIN1,Gpcr,HIP1R,HPCAL4,L1CAM,Lfa-1,MARK2,Mg2+-ATPase,NCALD,NDUFA3,NDUFAF1,NDUFB5,NRXN1,PPP1R21,RAB,Rab11,SH3GL1,Spectrin,TFRC,TMEM30A</p>                                                           |
| Network 23 | <p>Associated network functions: Cellular Assembly and Organization, RNA Post-Transcriptional Modification, Protein Trafficking</p> <p>Number of “focus molecules” contained in the network: 21</p> <p>IPA p-score: 24</p> <p>Network proteins: Alp,Alpha catenin,BSG,BTAF1,CD3,CHORDC1,DDI2,ELAVL3,GLUL,HABP4,HGS,HNRNPM,HTT,IKK (complex),IL12 (complex),Interferon alpha,JAK1/2,MAP2K4,Metalloprotease,PRKCG,Pdgfr,Pro-inflammatory Cytokine,Rbfox3,Rock,SDCBP,SERBP1,SGTB,SRSF2,Sfk,TJP1,TLN2,Tnf (family),UBE2I,USP9X,chemokine</p>         |
| Network 24 | <p>Associated network functions: Cellular Assembly and Organization, Cell-To-Cell Signaling and Interaction, Nervous System Development and Function</p> <p>Number of “focus molecules” contained in the network: 20</p> <p>IPA p-score: 22</p> <p>Network proteins: ATP6V0C,Caveolin,Dynamin,GDI1,GDI2,GRI,N-type Calcium Channel,NAPG,NSF,Neurexin,PACSIN2,PITPNB,Par6,Pkc(s),RAB4,RAB5A,RABEP1,Rab5,SLC6A9,SNAP25,SNAP29,STX12,STX2,STX4,STX6,SYP,Snare,Synapsin,Synaptotagmin,Syntaxin,Syntaxin1,VAMP1,VAMP2,YKT6,tubulin (family)</p>       |
| Network 25 | <p>Associated network functions: Cellular Assembly and Organization, Lipid Metabolism, Small Molecule Biochemistry</p> <p>Number of “focus molecules” contained in the network: 19</p> <p>IPA p-score: 20</p> <p>Network proteins: 1-acylglycerol-3-phosphate O-acyltransferase,ABCB7,ACSL6,ACTR2,AGPAT3,ARPC1A,ARPC3,ARPC4,Aconitase,Alpha actin,Ampa Receptor,BETA TUBULIN,CAMK2,CD3 group,CD82,DLG1,Dlg,Dynein,EF-1 alpha,GPM6A,GRIA3,Guk,LPCAT4,MBOAT7,MEF2,METAP2,MPP6,N-Cadherin,P38 MAPK,PDCL3,PGRMC1,PKC alpha/beta,Pp2b,SNCB,SUCLA2</p> |
